# Supplementary material
Source: Research Square preprint supplement (doi:10.21203/rs.3.rs-9245327/v1)
Supplement: Supplementary file 1 [file 051b36b93218386bd9aec4e7.docx]

Table 2. Prevalence and intensity of infection with abomasal nematodes in roe deer from Central Poland

| Nematode species | Iłża region | | | Rawa Mazowiecka region | | | Węgrów region | | | Together | | |
| --- | --- | --- | --- | --- | --- | --- | --- | --- | --- | --- | --- | --- |
| Prevalence | Intensity | | Prevalence | Intensity | | Prevalence | Intensity | | Prevalence | Intensity | |
| % | Range | Mean | % | Range | Mean | % | Range | Mean | % | Range | Mean |
| *Ashworthius sidemi* | 6.3 | 2-47 | 20 | 0 | 0 | 0 | 0 | 0 | 0 | 3.1 | 2-74 | 29 |
| *Haemonchus contortus* | 35.4 | 1-1019 | 161.5 | 45.2 | 1-143 | 23.8 | 47.4 | 9-2558 | 343.3 | 41.8 | 1-2558 | 157.5 |
| *Mazamastrongylus dagestanica* | 0 | 0 | 0 | 0 | 0 | 0 | 5.3 | 2-2 | 2 | 1 | 2-2 | 2 |
| *Ostertagia kolchida* | 2.1 | 1-1 | 1 | 0 | 0 | 0 | 0 | 0 | 0 | 1 | 1-1 | 1 |
| *O. leptospicularis* | 2.1 | 1-1 | 1 | 0 | 0 | 0 | 5.3 | 1-1 | 1 | 2 | 1-1 | 1 |
| *Spiculopteragia boehmi* | 2.1 | 1-1 | 1 | 0 | 0 | 0 | 0 | 0 | 0 | 1 | 1-1 | 1 |
| *Trichostrongylus capricola* | 0 | 0 | 0 | 0 | 0 | 0 | 5.3 | 1-1 | 1 | 1 | 1-1 | 1 |
| Together | 41.7 | 1-1020 | 140.6 | 45.2 | 1-143 | 23.8 | 47.4 | 9-2558 | 344.3 | 44.9 | 1-143 | 23.6 |
