# Supplementary material
Source: Research Square preprint supplement (doi:10.21203/rs.3.rs-9245327/v1)
Supplement: Supplementary file 2 [file 16cde4697343494787d62b82.docx]

Table 3. Prevalence and intensity of infection with small intestine nematodes in roe deer from Central Poland

| Nematode species | Iłża region | | | Rawa Mazowiecka region | | | Węgrów region | | | Together | | |
| --- | --- | --- | --- | --- | --- | --- | --- | --- | --- | --- | --- | --- |
| Prevalence | Intensity | | Prevalence | Intensity | | Prevalence | Intensity | | Prevalence | Intensity | |
| % | Range | Mean | % | Range | Mean | % | Range | Mean | % | Range | Mean |
| *Aonchotheca* sp. | 15.2 | 1-65 | 10.7 | 12.1 | 7-36 | 15.2 | 21 | 1-3 | 2 | 15.3 | 1-65 | 9.6 |
| *Bunostomum phlebotomum* | 2.2 | 3-3 | 3 | 0 | 0 | 0 | 0 | 0 | 0 | 1 | 3-3 | 3 |
| *Bunostomum trigonocephalum* | 4.3 | 2-2 | 2 | 9.1 | 1-5 | 2.7 | 5.3 | 2-2 | 2 | 6.1 | 1-5 | 2.3 |
| *Chabertia ovina* | 15.2 | 1-66 | 14.3 | 24.2 | 1-10 | 2.7 | 31.6 | 2-30 | 12.8 | 21.4 | 1-66 | 9.5 |
| *Haemonchus contortus* | 6.5 | 1.7 | 1-2 | 0 | 0 | 0 | 0 | 0 | 0 | 3.1 | 1-2 | 1.7 |
| *Nematodirus europeus* | 2.2 | 1-1 | 1 | 0 | 0 | 0 | 0 | 0 | 0 | 1 | 1-1 | 1 |
| *Oesophagostomum venulosum* | 4.3 | 1-3 | 2 | 9.1 | 1-1 | 1 | 5.3 | 1-1 | 1 | 6.1 | 1-3 | 1.3 |
| Together | 34.8 | 1-66 | 12 | 51.5 | 1-37 | 5.6 | 47.4 | 2-31 | 9.9 | 42.8 | 1-66 | 8.9 |
