# Supplementary material
Source: Research Square preprint supplement (doi:10.21203/rs.3.rs-9245327/v1)
Supplement: Supplementary file 3 [file 1ed27c5bf044b4e01d1d2ac5.docx]

Table 6. Comparison between the species composition and prevalence (%) of infection with abomasal nematodes of roe deer inhabiting areas outside the wind farms (C – control), and inside the wind farms (F – farm) in Central Poland.

| Nematode | Iłża region | | Rawa Mazowiecka region | | Węgrów region | | Together | |
| --- | --- | --- | --- | --- | --- | --- | --- | --- |
| C | F | C | F | C | F | C | F |
| *Ashworthius sidemi* | 3.3 | 11.1 | 0 | 0 | 0 | 0 | 1.6 | 5.6 |
| *Haemonchus contortus* | 20 | 61.1 | 38.1 | 50 | 54.5 | 50 | 32.3 | 55.6 |
| *Mazamastrongylus dagestanica* | 0 | 0 | 0 | 0 | 0 | 12.5 | 0 | 2.8 |
| *Ostertagia kolchida* | 0 | 5.6 | 0 | 0 | 0 | 0 | 0 | 2.8 |
| *O. leptospicularias* | 0 | 0 | 0 | 0 | 0 | 12.5 | 1.6 | 2.8 |
| *Spiculopteragia boehmi* | 0 | 5.6 | 0 | 0 | 0 | 0 | 0 | 2.8 |
| *Trichostrongylus capricola* | 0 | 0 | 0 | 0 | 0 | 12,5 | 0 | 2.8 |
