# Supplementary material
Source: Research Square preprint supplement (doi:10.21203/rs.3.rs-9245327/v1)
Supplement: Supplementary file 4 [file 622b15037451bf9bbfe3d1ef.docx]

Table. S1. Effects of wind farm (WF), study area (AREA), sex (SEX), and age (AGE) of animals on the number of nematodes in selected parts of the digestive tract in roe deer in separate generalized linear models; variables not included in the table for the given section of the digestive tract were excluded during model selection.

| Parameter | Estimate | St. error | Lower CI | Upper CI | Wald Chi2 | P-value |
| --- | --- | --- | --- | --- | --- | --- |
| ***Model 1: Abomasum*** | | | | | | |
| Intercept | 1.306 | 0.724 | -0.113 | 2.725 | 3.255 | 0.071 |
| WF (yes) | 0.733 | 0.272 | 0.200 | 1.265 | 7.277 | 0.007 |
| WF (no) | 0* |  |  |  |  |  |
| AREA (Iłża) | -0.799 | 0.306 | -1.399 | -0.200 | 8.827 | 0.009 |
| AREA (Rawa M.) | -0.961 | 0.412 | -1.768 | -0.153 | 5.437 | 0.020 |
| AREA (Węgrów) | 0* |  |  |  |  |  |
| SEX (F) | -2.907 | 0.365 | -3.623 | -2.190 | 63.267 | <0.001 |
| SEX (M) | 0* |  |  |  |  |  |
| AGE | 0.700 | 0.132 | 0.442 | 0.959 | 28.242 | <0.001 |
| ***Model 2: Small intestine*** | | | | | | |
| Intercept | 2.842 | 0.508 | 1.847 | 3.837 | 31.331 | <0.001 |
| WF (yes) | 0.671 | 0.241 | 0.198 | 1.144 | 7.735 | 0.005 |
| WF (no) | 0* |  |  |  |  |  |
| AREA (Iłża) | -0.329 | 0.316 | -0.948 | 0.291 | 1.083 | 0.298 |
| AREA (Rawa M.) | -0.754 | 0.345 | -1.430 | -0.078 | 4.774 | 0.029 |
| AREA (Węgrów) | 0* |  |  |  |  |  |
| AGE | -0.382 | 0.105 | -0.588 | -0.176 | 13.204 | <0.001 |
| ***Model 3: Large intestine*** | | | | | | |
| Intercept | 3.050 | 0.539 | 1.993 | 4.107 | 32.002 | <0.001 |
| AREA (Iłża) | 0.916 | 0.303 | 0.321 | 1.510 | 9.112 | 0.003 |
| AREA (Rawa M.) | 0.975 | 0.345 | 0.299 | 1.651 | 7.998 | 0.005 |
| AREA (Węgrów) | 0* |  |  |  |  |  |
| SEX (F) | -1.531 | 0.313 | -2.145 | -0.917 | 23.868 | <0.001 |
| SEX (M) | 0* |  |  |  |  |  |
| AGE | -0.163 | 0.103 | -0.365 | 0.039 | 2.505 | 0.113 |
| ***Model 4: Cecum*** | | | | | | |
| Intercept | 0.867 | 0.335 | 0.211 | 1.524 | 6.700 | 0.010 |
| WF (yes) | 0.689 | 0.251 | 0.198 | 1.181 | 7.569 | 0.006 |
| WF (no) | 0* |  |  |  |  |  |
| AREA (Iłża) | 0.815 | 0.314 | 0.199 | 1.431 | 6.729 | 0.009 |
| AREA (Rawa M.) | 0.535 | 0.335 | -0.121 | 1.192 | 2.556 | 0.110 |
| AREA (Węgrów) | 0* |  |  |  |  |  |
| SEX (F) | -0.372 | 0.245 | -0.852 | 0.107 | 2.316 | 0.128 |
| SEX (M) | 0* |  |  |  |  |  |
