# Supplementary material
Source: Research Square preprint supplement (doi:10.21203/rs.3.rs-9245327/v1)
Supplement: Supplementary file 5 [file 6a0177f4e484171c56eefab1.docx]

Table 7. Comparison between the species composition and prevalence (%) of infection with small intestine helminths of roe deer inhabiting areas outside the wind farms (C – control), and inside the wind farms (F – farm) in Central Poland

| Helminth | Iłża region | | Rawa Mazowiecka region | | Węgrów region | | Together | |
| --- | --- | --- | --- | --- | --- | --- | --- | --- |
| C | F | C | F | C | F | C | F |
| *Bunostomum phlebotomum* | 0 | 5.9 | 0 | 0 | 0 | 0 | 0 | 2.6 |
| *Bunostomum trigonocephalum* | 0 | 5.9 | 4.8 | 16.7 | 10 | 0 | 3.3 | 7.9 |
| *Haemonchus contortus* | 0 | 11.8 | 0 | 0 | 0 | 0 | 0 | 5.3 |
| *Moniezia* sp. | 3.4 | 5.9 | 0 | 0 | 0 | 22.2 | 1.7 | 7.9 |
| *Nematodirus europeus* | 0 | 0 | 0 | 8.3 | 0 | 0 | 1.7 | 2.6 |
| *Oesophagostomum venulosum* | 0 | 11.8 | 9.5 | 8.3 | 0 | 0 | 3.3 | 10.5 |
