# Supplementary material
Source: Research Square preprint supplement (doi:10.21203/rs.3.rs-9245327/v1)
Supplement: Supplementary file 6 [file 7a8ef66a132c62c391dc67e0.docx]

Table 4. Prevalence and intensity of infection with large intestine nematodes in roe deer from Central Poland

| Nematode species | Iłża region | | | Rawa Mazowiecka region | | | Węgrów region | | | Together | | |
| --- | --- | --- | --- | --- | --- | --- | --- | --- | --- | --- | --- | --- |
| Prevalence | Intensity | | Prevalence | Intensity | | Prevalence | Intensity | | Prevalence | Intensity | |
| % | Range | Mean | % | Range | Mean | % | Range | Mean | % | Range | Mean |
| *Bunostomum trigonocephalum* | 0 | 0 | 0 | 4.2 | 1-1 | 1 | 0 | 0 | 0 | 1.1 | 1-1 | 1 |
| *Chabertia ovina* | 68.7 | 1-117 | 22.4 | 70.8 | 1-66 | 19.6 | 63.2 | 2-43 | 11.6 | 68.1 | 1-117 | 19.6 |
| *Oesophagostomum venulosum* | 10.4 | 1-5 | 2.2 | 16.7 | 1-3 | 1.5 | 15.8 | 1-12 | 5 | 13.2 | 1-12 | 2.7 |
| *Trichuris* sp. | 10.4 | 1-2 | 1.6 | 4.2 | 1-1 | 1 | 10.5 | 1-3 | 2 | 11 | 1-3 | 1.6 |
| Together | 75 | 1-118 | 21.1 | 70.8 | 1-67 | 19.9 | 73.7 | 1-43 | 11.3 | 73.6 | 1-118 | 18.8 |
