# Supplementary material
Source: Research Square preprint supplement (doi:10.21203/rs.3.rs-9245327/v1)
Supplement: Supplementary file 7 [file eb559427ce66aa80dc425136.docx]

Table 1. The number of samples from roe deer inhabiting areas outside the wind farms (C – control), and inside the wind farms (F – farm) in various regions of Central Poland.

| Sample | Iłża region | Rawa Mazowiecka region | Węgrów region |
| --- | --- | --- | --- |
| Animals examined | 48 (30 C, 18 F) | 34 (22 C, 12 F) | 20 (11 C, 9 F) |
| Abomasum | 48 (30 C, 18F) | 31 (21 C, 10 F) | 19 (11 C, 8 F) |
| Small intestine | 46 (29 C, 17 F) | 33 (21 C, 12 F) | 19 (10 C, 9 F) |
| Large intestine | 48 (29 C, 19 F) | 24 (16 C, 8 F) | 19 (10 C, 9 F) |
| Cecum | 47 (29 C, 18 F) | 31 (19 C, 12 F) | 20 (11 C, 9 F) |
