# Supplementary material
Source: Research Square preprint supplement (doi:10.21203/rs.3.rs-9245327/v1)
Supplement: Supplementary file 8 [file f62742822b14ac2f7a39bf1b.docx]

Table 8. Comparison between the species composition and prevalence (%) of infection with large intestine and cecum nematodes of roe deer inhabiting areas outside the wind farms (C – control), and inside the wind farms (F – farm) in Central Poland

| Location | Nematode | Iłża region | | Rawa Mazowiecka region | | Węgrów region | | Together | |
| --- | --- | --- | --- | --- | --- | --- | --- | --- | --- |
| C | F | C | F | C | F | C | F |
| Large intestine | *Bunostomum trigonocephalum* | 0 | 0 | 0 | 12.5 | 0 | 0 | 0 | 2.8 |
| *Chabertia ovina* | 69 | 68.4 | 56.3 | 100 | 60 | 66.7 | 63.6 | 75 |
| *Oesophagostomum venulosum* | 3.4 | 21 | 12.5 | 25 | 20 | 11.1 | 9.1 | 19.4 |
| *Trichuris* sp | 6.9 | 10.5 | 6.2 | 0 | 20 | 0 | 9.1 | 5.5 |
| Cecum | *Ch. ovina* | 20.7 | 44.4 | 15.8 | 25 | 0 | 0 | 5.1 | 10.3 |
| *Haemonchus contortus* | 0 | 5.5 | 0 | 0 | 0 | 0 | 0 | 2.6 |
| *Oe. venulosum* | 20.7 | 44.4 | 26.3 | 25 | 18.2 | 55.6 | 22 | 41 |
| *Trichuris* sp. | 55.2 | 61.1 | 47.4 | 41.7 | 36.4 | 22.2 | 49.1 | 46.1 |
