# Supplementary material
Source: Research Square preprint supplement (doi:10.21203/rs.3.rs-9245327/v1)
Supplement: Supplementary file 9 [file f9fd47657549eb28faae2466.docx]

Table 5. Prevalence and intensity of infection with cecum nematodes in roe deer from Central Poland

| Nematode species | Iłża region | | | Rawa Mazowiecka region | | | Węgrów region | | | Together | | |
| --- | --- | --- | --- | --- | --- | --- | --- | --- | --- | --- | --- | --- |
| Prevalence | Intensity | | Prevalence | Intensity | | Prevalence | Intensity | | Prevalence | Intensity | |
| % | Range | Mean | % | Range | Mean | % | Range | Mean | % | Range | Mean |
| *Chabertia ovina* | 2.1 | 1-1 | 1 | 19.3 | 1-3 | 1.3 | 0 | 0 | 0 | 7.1 | 1-3 | 1.3 |
| *Haemonchus contortus* | 2.1 | 2-2 | 2 | 0 | 0 | 0 | 0 | 0 | 0 | 1 | 2-2 | 2 |
| *Oesophagostomum venulosum* | 31.9 | 1-25 | 9 | 15.8 | 1-13 | 6 | 35 | 3-9 | 5.6 | 30.6 | 1-25 | 7.4 |
| *Trichuris* sp. | 55.3 | 1-46 | 7 | 45.2 | 1-26 | 6.1 | 30 | 1-13 | 4 | 46.9 | 1-46 | 6.3 |
| Together | 68.1 | 1-46 | 10 | 64.5 | 1-32 | 7 | 50 | 2-19 | 6.3 | 63.3 | 1-46 | 8.5 |
